# Supplementary material for: Frequency of Appropriate Use of Pancreatic Enzyme Replacement Therapy and Symptomatic Response in Pancreatic Cancer Patients
Source: PubMed Central journal article supplement — Pancreas. 2019 Jun 19;48(6):780–6. doi: 10.1097/MPA.0000000000001330 (PMC6749961; doi:10.1097/mpa.0000000000001330), 2019-06-19
Supplement: mpa-48-780-s001.pdf [file mpa-48-780-s001.pdf]

# Frequency of Appropriate Use of Pancreatic Enzyme Replacement Therapy and Symptomatic Response in Pancreatic Cancer Patients

## SUPPLEMENT DIGITAL CONTENT

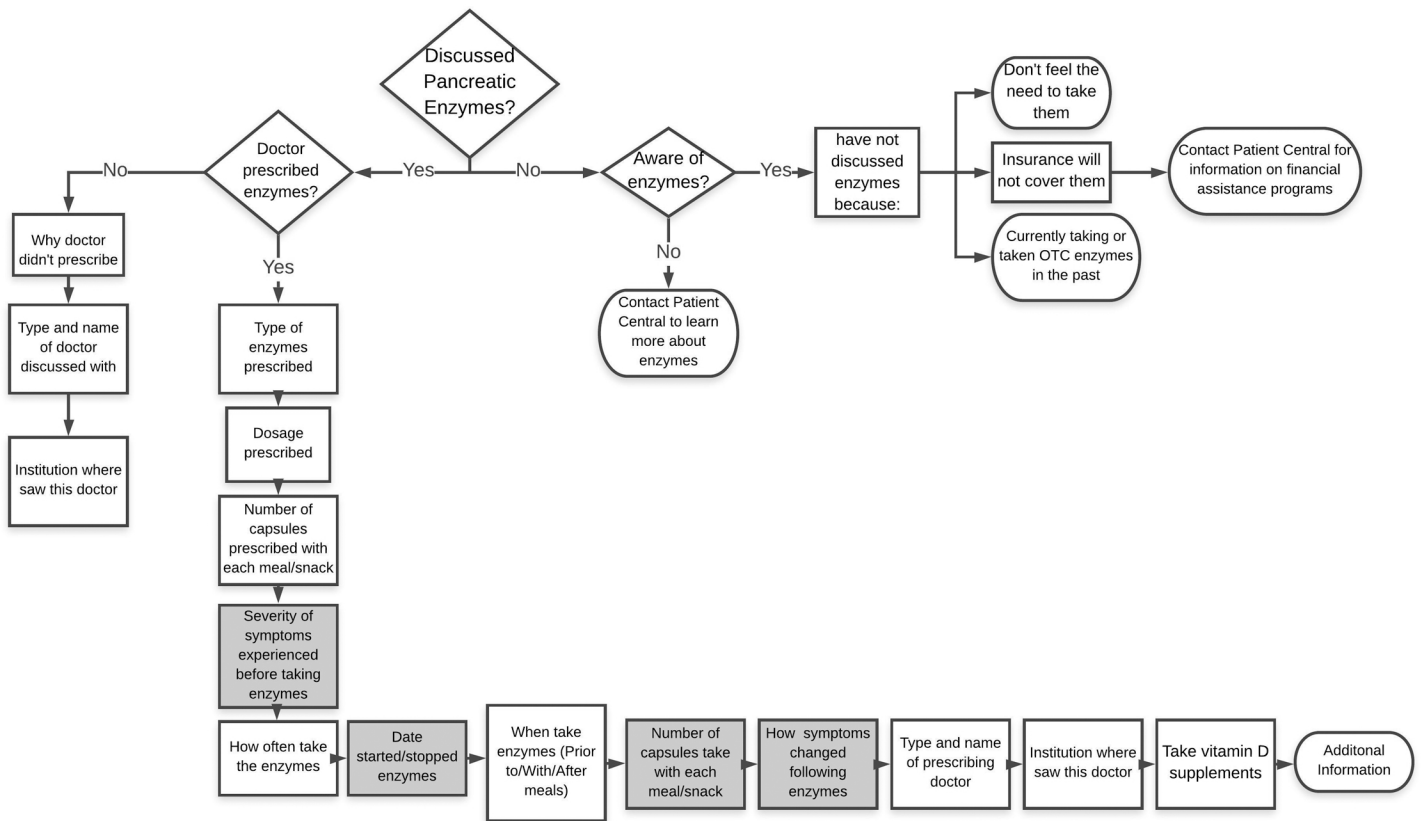

**SUPPLEMENTAL FIGURE 1.** Questions from the updated PE survey. Shaded boxes refer to questions added to the PE survey in January 2018.
